# Supplementary material
Source: publisher site journal article supplement (https://static.cambridge.org/content/id/urn:cambridge.org:id:article:S1368980020001111/resource/name/S1368980020001111supp001.docx)
Supplement: Supplementary file 1 [file S1368980020001111supp001.docx]

**Appendix Table 1:** Cross-Walk between EMA Food Categories and NDSR Food Subgroups

| **EMA Food Categories** | **Corresponding NDSR Food Subgroups** | |
| --- | --- | --- |
| Fruit | FRU0100 | Citrus Juice |
|  | FRU0200 | Fruit Juice Excluding Citrus Juice |
|  | FRU0300 | Citrus Fruit |
|  | FRU0400 | Fruit Excluding Citrus Fruit |
|  | FRU0500 | Avocado and similar |
|  | FRU0600 | Fried fruits |
|  | FRU0700 | Fruit-based Savory Snack |
| Vegetables | VEG0100 | Dark-Greek Vegetables |
|  | VEG0200 | Deep-Yellow Vegetables |
|  | VEG0300 | Tomato |
|  | VEG0400 | White Potatoes |
|  | VEG0450 | Other Starchy Vegetables |
|  | VEG0500 | Vegetable Juice |
|  | VEG0600 | Other Vegetables |
|  | VEG0800 | Fried Potatoes |
|  | VEG0900 | Fried Vegetables (other than potatoes) |
| Whole grains | GRW0100 | Grains, Flour and Dry Mixes--Whole Grain |
| (e.g., whole wheat breads or cereals, | GRW0200 | Loaf-type Bread and Plain Rolls--Whole Grain |
| brown rice, oatmeal, corn tortillas) | GRW0300 | Other Breads (quick breads, corn muffins, tortillas)--Whole Grain |
|  | GRW0400 | Crackers--Whole Grain |
|  | GRW0500 | Pasta--Whole Grain |
|  | GRW0600 | Ready-to-Eat Cereal (not presweetened)--Whole Grain |
|  | GRW0700 | Ready-to-Eat Cereal (presweetened)--Whole Grain |
|  | GRW0900 | Snack Chips--Whole Grain |
|  | GRW1000 | Snack Bars--Whole Grain |
|  | GRW1100 | Popcorn |
|  | GRW1200 | Flavored Popcorn |
|  | GRS0100 | Grains, Flour and Dry Mixes--Some Whole Grains |
|  | GRS0200 | Loaf-type Bread and Plain Rolls--Some Whole Grains |
|  | GRS0300 | Other Breads (quick breads, corn muffins, tortillas)--Some Whole Grains |
|  | GRS0400 | Crackers--Some Whole Grains |
|  | GRS0500 | Pasta--Some Whole Grains |
|  | GRS0600 | Ready-to-eat Cereal (not presweetened)--Some Whole Grains |
|  | GRS0700 | Ready-to eat Cereal (presweetened)--Some Whole Grains |
|  | GRS0900 | Snack Chips--Some Whole Grains |
|  | GRS1000 | Snack Bars--Some Whole Grains |
| Refined grains | GRR0100 | Grains, Flour and Dry Mixes--Refined Grain |
| (e.g., white bread or cereals, flour tortillas, | GRR0200 | Loaf-type Bread and Plain Rolls--Refined Grain |
| white rice) | GRR0300 | Other Breads (quick breads, corn muffins, tortillas)--Refined Grain |
|  | GRR0400 | Crackers--Refined Grain |
|  | GRR0500 | Pasta--Refined Grain |
|  | GRR0600 | Ready-to-eat Cereal (not presweetened)--Refined Grain |
|  | GRR0700 | Ready-to eat Cereal (presweetened)--Refined Grains |
|  | GRR0900 | Snack Chips--Refined Grains |
|  | GRR1000 | Snack Bars--Refined Grain |
| Dairy | DMF0100 | Milk--Whole |
| (e.g., milk, cheese, yogurt, milk | DML0100 | Milk--Low Fat and Fat Free |
| alternate such as soy milk, ice cream) | DMR0100 | Milk--Reduced Fat |
|  | DMN0100 | Milk--Nondairy |
|  | DCF0100 | Cheese--Full Fat |
|  | DCL0100 | Cheese--Low Fat and Fat Free |
|  | DCR0100 | Cheese--Reduced Fat |
|  | DCN0100 | Cheese--Nondairy |
|  | DYF0100 | Yogurt--Sweetened Whole Milk |
|  | DYL0100 | Yogurt--Sweetened Fat Free |
|  | DYR0100 | Yogurt--Sweetened Low Fat |
|  | DYN0100 | Yogurt--Nondairy |
|  | DYF0200 | Yogurt--Artificially Sweetened Whole Milk |
|  | DYL0200 | Yogurt--Artificially Sweetened Fat Free |
|  | DYR0200 | Yogurt--Artificially Sweetened Low Fat |
|  | DMF0200 | Ready-to-drink Flavored Milk--Whole |
|  | DML0200 | Ready-to-drink Flavored Milk--Low Fat & Fat Free |
|  | DMR0200 | Ready-to-drink Flavored Milk--Reduced Fat |
|  | DML0300 | Sweetened Flavored Milk Beverage Powder with Non-fat Dry Milk |
|  | DML0400 | Artificially Sweetened Flavored Milk Beverage Powder with Non-fat Dry Milk |
|  | DOT0100 | Frozen Dairy Dessert |
|  | DOT0200 | Frozen Nondairy Dessert |
|  | DOT0300 | Pudding and Other Dairy Dessert |
|  | DOT0400 | Artificially Sweetened Pudding and Other Dairy Dessert |
|  | DOT0500 | Dairy-based Sweetened Meal Replacement/Supplement |
|  | DOT0600 | Dairy-based Artificially Sweetened Meal Replacement/Supplement |
|  | DOT0700 | Infant formula |
| Meat protein | MRL0100 | Lean Beef |
| (e.g., chicken, beef, seafood/fish) | MPL0100 | Lean Poultry |
|  | MFL0100 | Lean Fish--Fresh and Smoked |
|  | MRF0100 | Beef |
|  | MPF0100 | Poultry |
|  | MFF0100 | Fish--Fresh and Smoked |
|  | MSL0100 | Shellfish |
|  | MCF0100 | Cold Cuts and Sausage |
|  | MCL0100 | Lean Cold Cuts and Sausage |
|  | MOF0100 | Organ Meats |
|  | MSF0100 | Fried Shellfish--Commercial Entrée and Fast Food |
|  | MRL0200 | Lean Veal |
|  | MCL0200 | Lean Cured Pork |
|  | MRF0200 | Veal |
|  | MCF0200 | Cured Pork |
|  | FMC0200 | Meat-based Savory Snack |
|  | MPF0200 | Fried Chicken--Commercial Entrée and Fast Food |
|  | MFF0200 | Fried Fish--Commercial Entrée and Fast Food |
|  | MRL0300 | Lean Lamb |
|  | MRF0300 | Lamb |
|  | MRL0400 | Lean Fresh Pork |
|  | MRF0400 | Fresh Pork |
|  | MRF0500 | Game |
| Beans, eggs, seeds, nuts, tofu | VEG0700 | Legumes (cooked dried beans) |
|  | MOF0300 | Eggs |
|  | MOF0500 | Nuts and Seeds |
|  | MOF0600 | Nut and Seed Butters |
|  | MOF0700 | Meat alternatives |
| Sugary drinks | BVS0100 | Sweetened Coffee |
| (e.g., pop, Kool-Aid, Capri Sun, | BVS0300 | Sweetened Fruit Drinks |
| Sunny Delight, sports drinks) | BVS0400 | Sweetened Soft Drinks |
|  | BVS0500 | Sweetened Tea |
|  | BVS0600 | Sweetened Water |
|  | BVA0100 | Artificially Sweetened Coffee |
|  | BVA0300 | Artificially Sweetened Fruit Drinks |
|  | BVA0400 | Artificially Sweetened Soft Drinks |
|  | BVA0500 | Artificially Sweetened Tea |
|  | BVA0600 | Artificially Sweetened Water |
| Cake/cupcake/cookies | GRS0800 | Cakes, Cookies, Pies, Pastries, Danish, Doughnuts and Cobblers--Some Whole Grain |
| or other baked goods & Candy | GRW0800 | Cakes, Cookies, Pies, Pastries, Danish, Doughnuts and Cobblers--Whole Grain |
| (e.g., sweets, chocolate, Gushers, | GRR0800 | Cakes, Cookies, Pies, Pastries, Danish, Doughnuts and Cobblers--Refined Grains |
| fruit snacks) | SWT0100 | Chocolate Candy |
|  | SWT0200 | Non-Chocolate Candy |
